# Supplementary material for: Regional Variation of Chemical Characteristics in Young Marselan (Vitis vinifera L.) Red Wines from Five Regions of China
Source: MDPI journal article supplement (doi:10.3390/foods11060787), 2022-03-09
Supplement: s1 [file s1]

### Supplementary material

**Table S1.** Number of Marselan wine samples with various vintages from different wine regions in China.

| Wine region*       | 2012 | 2013 | 2014 | 2015 | 2016 | Total |
|--------------------|------|------|------|------|------|-------|
| Jiaodong Peninsula |      | 1    | 2    | 3    | 3    | 9     |
| Bohai Bay          |      |      |      | 2    | 2    | 4     |
| Huaizhuo Basin     | 1    | 1    | 1    | 4    | 3    | 10    |
| Loess Plateau      | 1    | 1    | 1    | 1    | 3    | 7     |
| Xinjiang           |      |      | 3    | 3    | 2    | 8     |

\* Jiaodong Peninsula wines were collected from Qingdao, Yantai, and Weihai sub-regions. Bohai Bay wines were collected from Changli sub-region. Huaizhuo Basin wines were collected from Huailai sub-region. Loess Plateau wines were collected from Taigu and Linfen sub-regions. Xinjiang wines were collected from Manasi and Yanqi sub-regions.

**Table S2.** Climatic type of wine-producing regions in China in this study according to the Köppen-Geiger climate classification system.

| Region             | Sub-region           | Climate type                                                  |
|--------------------|----------------------|---------------------------------------------------------------|
| Jiaodong Peninsula | Yantai               | Monsoon-influenced humid subtropical climate (CWA)            |
|                    | Qingdao              | Monsoon-influenced humid subtropical climate (CWA)            |
|                    | Weihai               | Monsoon-influenced humid subtropical climate (CWA)            |
| Bohai Bay          | Changli              | Monsoon-influenced hot-summer humid continental climate (DWA) |
|                    |                      |                                                               |
| Huaizhuo Basin     | Huailai <sup>a</sup> | Cold semi-arid climate (BSK)                                  |
| Loess Plateau      | Taigu                | Cold semi-arid climate (BSK)                                  |
|                    | Linfen               | Cold semi-arid climate (BSK)                                  |
| Xinjiang           | Manasi <sup>b</sup>  | Cold semi-arid climate (BSK)                                  |
|                    | Yanqi                | Cold desert climate (BWK)                                     |

<sup>a</sup> The climate type of Huailai region is based on Zhangjiakou City; <sup>b</sup> The climate type of Manasi region is based on Changji State.

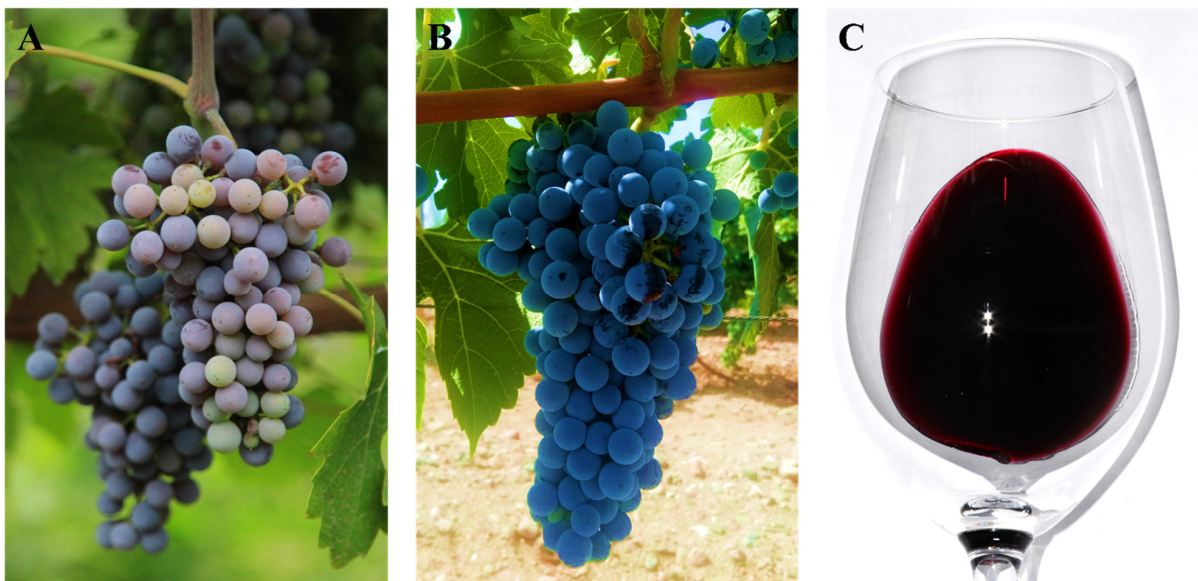

**Figure S1.** Photographs of Marselan grape at veraison stage (A) and mature stage (B), and young wine in a glass (C).

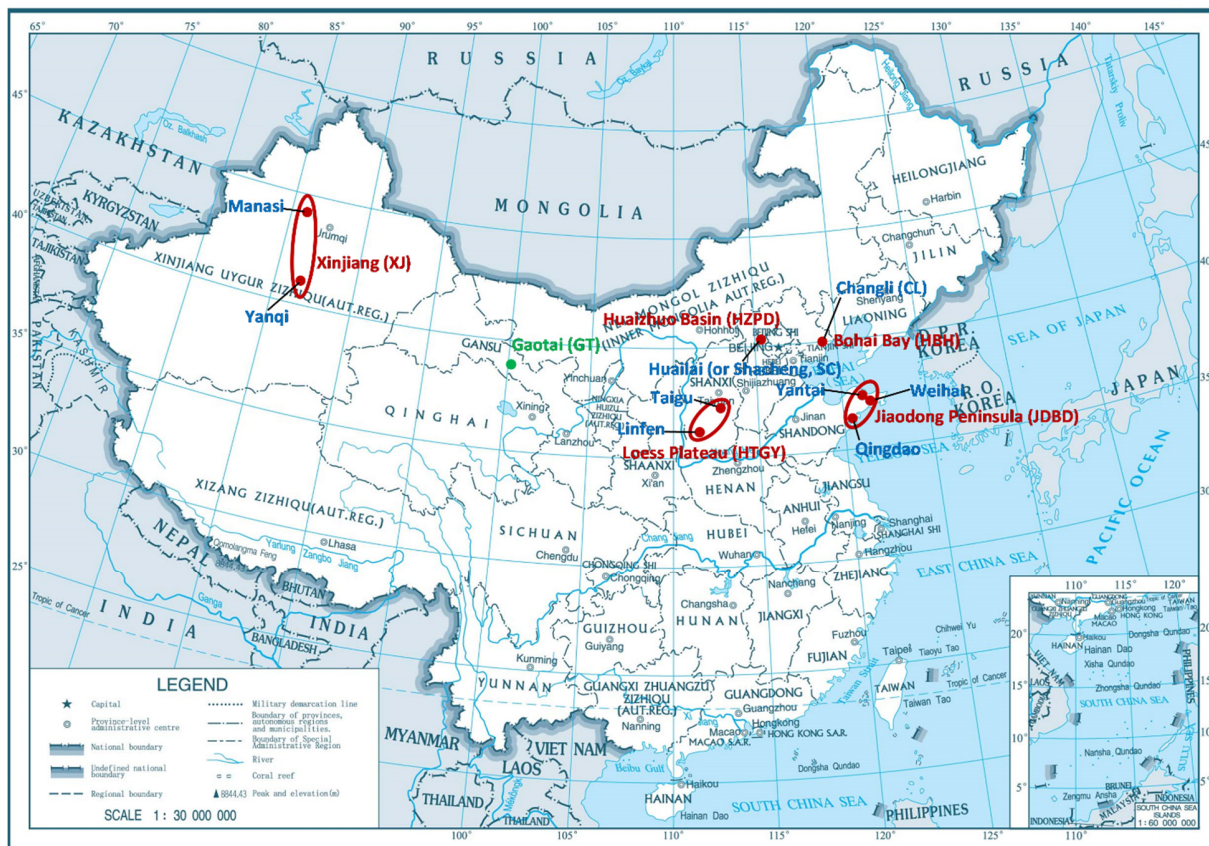

**Figure S2.** Regional distribution of wine production in China in this study.
